# Supplementary material for: Natural and Anthropogenic Hybridization in Two Species of Eastern Brazilian Marmosets (Callithrix jacchus and C. penicillata)
Source: PLoS One. 2015 Jun 10;10(6):e0127268. doi: 10.1371/journal.pone.0127268 (PMC4464756; doi:10.1371/journal.pone.0127268)
Supplement: S5 Table — (DOCX) [file pone.0127268.s007.docx]

S5 Table. Locus-by-locus summary of various genetic diversity indices for the PJ natural hybrid zone. N is number of individuals sampled at a locus, A is the number of alleles at a locus, R is allelic richness, r is EM null allele frequency, Ho is observed heterozygosity, HE is expected heterozygosity, FIS is the inbreeding coefficient. FIS values in bold indicate loci which were flagged by Microchecker for the possible presence of null alleles. FIS values that are starred are significant for Hardy-Weinberg disequilibrium for various *P-*values as follows: * = p<0.05, ** = p<0.01,*** = p<0.001.

| **Locus** | **PJ Zone** | | | | | | |
| --- | --- | --- | --- | --- | --- | --- | --- |
|  | **N** | ***A*** | **R** | **r** | **Ho** | **HE** | **FIS** |
| caja1 | 42 | 11 | 9.705 | 0.009 | 0.738 | 0.747 | 0.011 |
| caja10 | 42 | 12 | 11.598 | 0.042 | 0.810 | 0.889 | 0.089*** |
| caja11 | 42 | 9 | 8.256 | 0.000 | 0.786 | 0.747 | -0.052 |
| caja12 | 42 | 11 | 9.587 | 0.005 | 0.548 | 0.610 | 0.103 |
| caja13 | 42 | 7 | 6.683 | 0.021 | 0.714 | 0.731 | 0.022 |
| caja14 | 42 | 10 | 8.970 | 0.068 | 0.643 | 0.788 | **0.184*** |
| caja15 | 43 | 8 | 7.467 | 0.135 | 0.442 | 0.687 | **0.357***** |
| caja16 | 37 | 7 | 6.686 | 0.013 | 0.622 | 0.592 | -0.050 |
| caja17 | 42 | 10 | 9.194 | 0.061 | 0.714 | 0.845 | 0.155 |
| caja18 | 41 | 8 | 7.383 | 0.069 | 0.415 | 0.577 | **0.282*** |
| caja19 | 37 | 4 | 3.784 | 0.228 | 0.189 | 0.519 | **0.635***** |
| caja5 | 42 | 5 | 4.682 | 0.131 | 0.429 | 0.612 | **0.3**** |
| caja9 | 41 | 9 | 8.241 | 0.036 | 0.659 | 0.775 | 0.150 |
| cj1 | 41 | 8 | 7.097 | 0.149 | 0.390 | 0.653 | **0.403*** |
| cj11 | 40 | 4 | 3.720 | 0.135 | 0.275 | 0.471 | 0.416 |
| cj14 | 40 | 13 | 11.421 | 0.026 | 0.725 | 0.742 | 0.022 |
| cj6 | 40 | 5 | 4.889 | 0.050 | 0.425 | 0.529 | 0.197 |
| ham1 | 40 | 10 | 9.284 | 0.035 | 0.675 | 0.754 | 0.105 |
| ham100 | 37 | 9 | 8.522 | 0.036 | 0.757 | 0.800 | 0.054 |
| ham101 | 41 | 8 | 7.518 | 0.040 | 0.659 | 0.764 | 0.138 |
| ham102 | 41 | 8 | 7.677 | 0.028 | 0.756 | 0.804 | 0.059 |
| ham103 | 29 | 9 | 9.000 | 0.288 | 0.276 | 0.797 | **0.654***** |
| Ham107 | 40 | 9 | 8.349 | 0.097 | 0.525 | 0.677 | 0.224 |
| ham116 | 35 | 6 | 5.827 | 0.260 | 0.171 | 0.609 | **0.718***** |
| ham120 | 40 | 9 | 8.165 | 0.000 | 0.675 | 0.662 | -0.019 |
| ham123 | 38 | 10 | 9.641 | 0.053 | 0.737 | 0.808 | 0.088 |
| ham141 | 32 | 8 | 7.898 | 0.094 | 0.625 | 0.791 | 0.210 |
| ham146 | 39 | 6 | 5.472 | 0.024 | 0.410 | 0.464 | 0.115 |
| Ham150 | 38 | 6 | 5.986 | 0.106 | 0.526 | 0.692 | 0.240 |
| ham181 | 40 | 12 | 10.514 | 0.069 | 0.625 | 0.771 | 0.189 |
| ham184 | 36 | 6 | 5.929 | 0.122 | 0.556 | 0.753 | 0.262 |
| ham26 | 42 | 9 | 8.167 | 0.005 | 0.786 | 0.768 | -0.023 |
| ham3 | 38 | 9 | 8.459 | 0.052 | 0.684 | 0.787 | 0.131 |
| ham30 | 40 | 8 | 7.614 | 0.004 | 0.875 | 0.794 | -0.102 |
| ham38 | 39 | 11 | 10.146 | 0.118 | 0.564 | 0.791 | **0.287*** |
| ham47 | 41 | 7 | 6.970 | 0.011 | 0.780 | 0.789 | 0.011 |
| ham55 | 36 | 7 | 6.576 | 0.058 | 0.556 | 0.656 | 0.154 |
| ham57 | 41 | 5 | 4.701 | 0.071 | 0.488 | 0.592 | 0.176 |
| ham60 | 40 | 7 | 6.448 | 0.116 | 0.500 | 0.696 | 0.281 |
| ham79 | 35 | 4 | 3.829 | 0.043 | 0.543 | 0.636 | 0.146 |
| ham8 | 39 | 11 | 9.847 | 0.049 | 0.590 | 0.696 | 0.152 |
| ham91 | 43 | 11 | 9.448 | 0.023 | 0.488 | 0.575 | 0.151* |
| ham96 | 36 | 9 | 8.345 | 0.009 | 0.750 | 0.767 | 0.022 |
| lchu06 | 41 | 10 | 9.433 | 0.140 | 0.463 | 0.710 | **0.347***** |
| Per Locus Average | 39.386 | 8.295 | 7.707 | 0.071 | 0.581 | 0.703 | 0.173 |
